# Supplementary material
Source: Springer Nature journal article supplement (https://www.springermedizin.de/resource/supplementary/12889_2011_3757_MOESM1_ESM.pdf/9491092)
Supplement: MOESM1 [file 9491092]

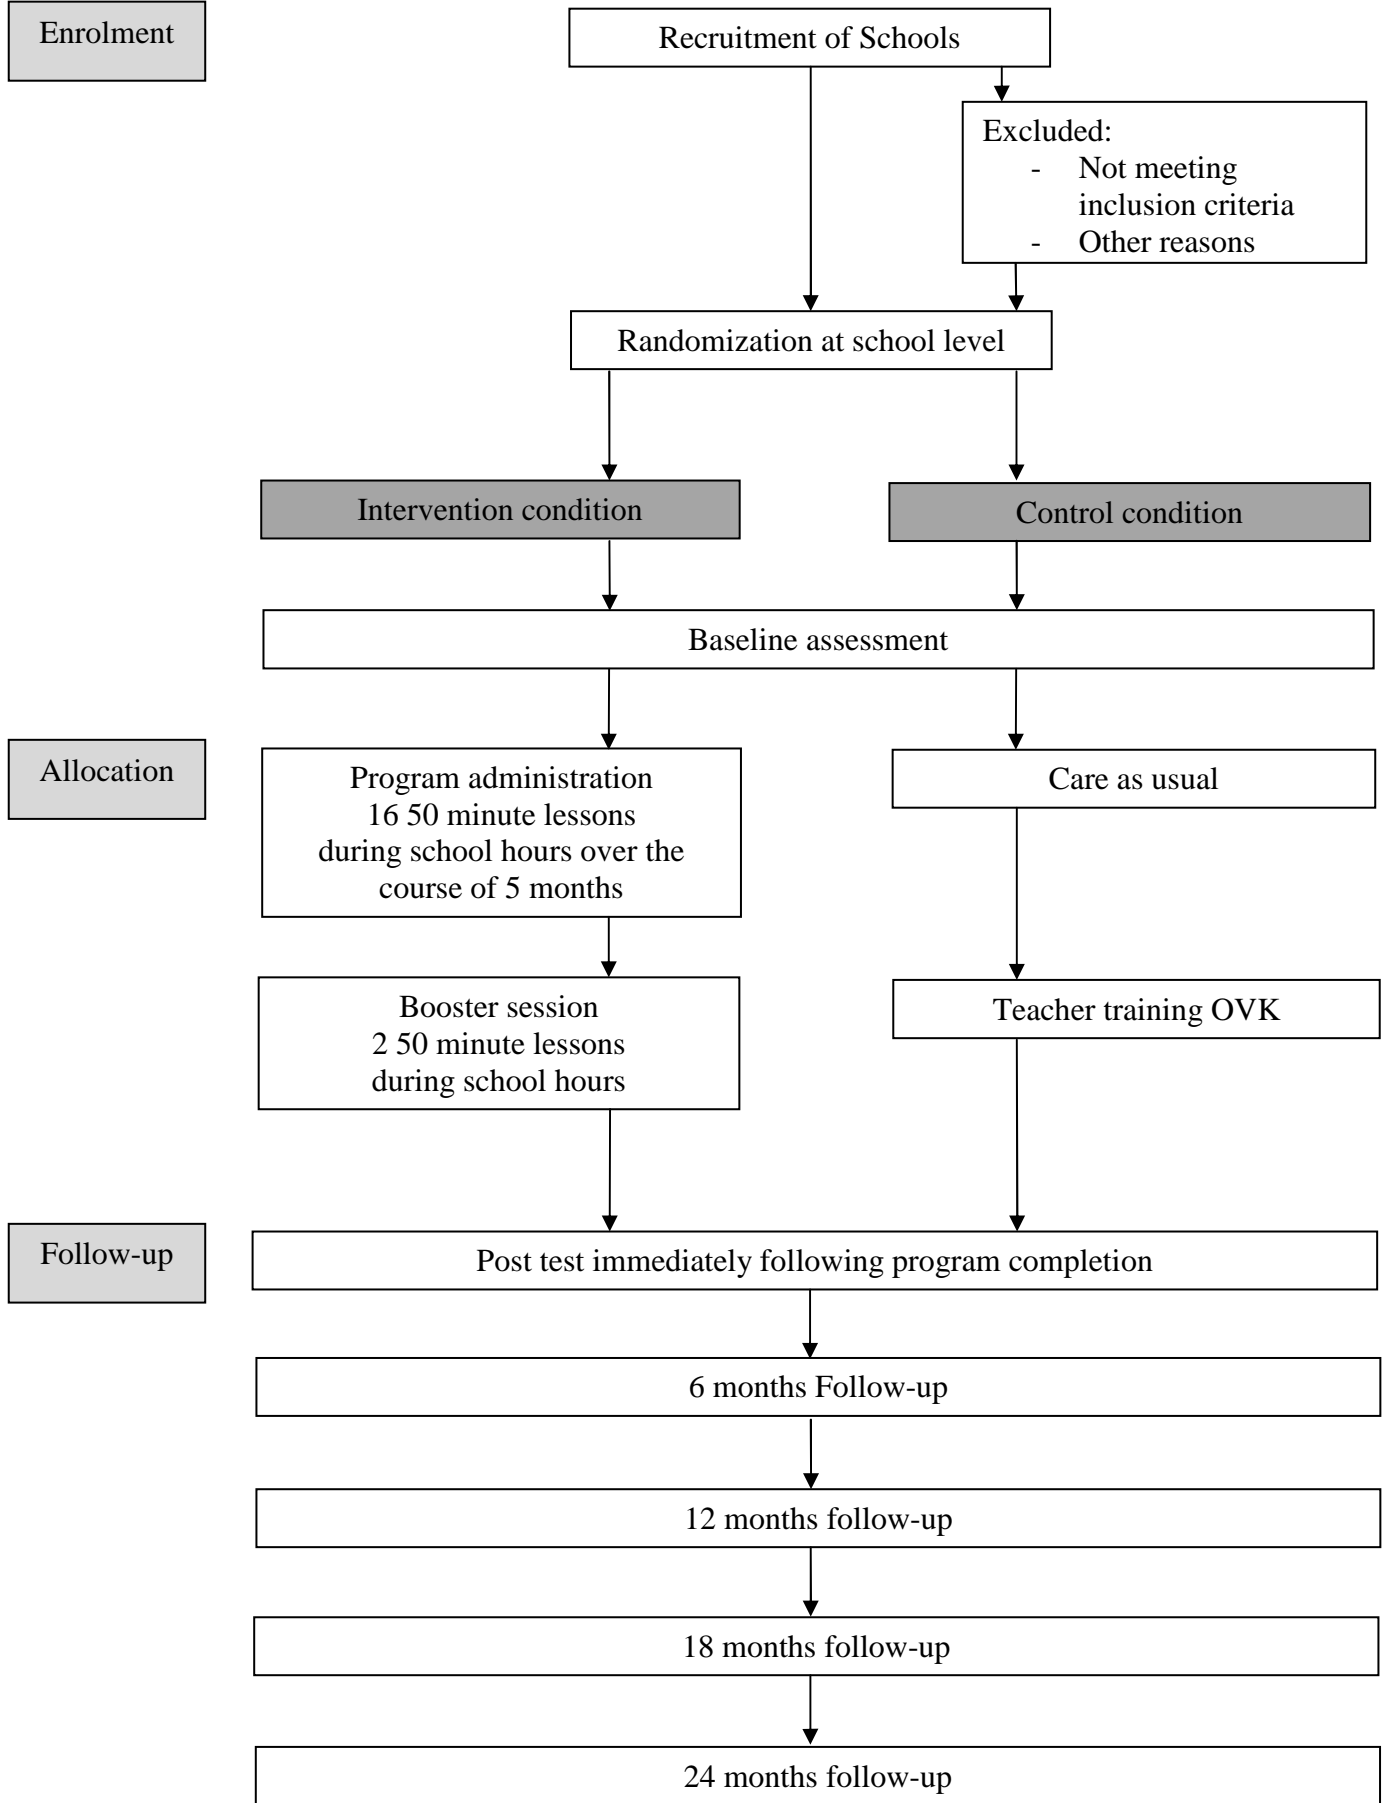

Enrolment

Recruitment of Schools

Excluded:

- Not meeting inclusion criteria
- Other reasons

Randomization at school level

Intervention condition

Control condition

Baseline assessment

Allocation

Program administration  
16 50 minute lessons  
during school hours over the  
course of 5 months

Care as usual

Booster session  
2 50 minute lessons  
during school hours

Teacher training OVK

Follow-up

Post test immediately following program completion

6 months Follow-up

12 months follow-up

18 months follow-up

24 months follow-up
